# Supplementary material for: FGF21 regulates hepatic metabolic pathways to improve steatosis and inflammation
Source: PubMed Central journal article supplement — Endocr Connect. 2020 Jul 19;9(8):755–68. doi: 10.1530/EC-20-0152 (PMC7424338; doi:10.1530/ec-20-0152), 2020-07-19
Supplement: supplementary_table_1.pdf [file supplementary_table_1.pdf]

## 1 Supplementary Table 1

### 2 Primer sequences used for qPCR.

| Target         | Forward primer<br>(5' to 3') | Reverse primer<br>(5' to 3') | Amplicon<br>size |
|----------------|------------------------------|------------------------------|------------------|
| <i>Abcg5</i>   | CGCGAGACGTTGCGATACA          | CTGCCAATCATTGGTCCGC          | 128              |
| <i>Abcg8</i>   | CTGTGGAATGGGACTGTACTTC       | GTTGGACTGACCACTGTAGGT        | 108              |
| <i>Acaca</i>   | AATGAACGTGCAATCCGATTTG       | ACTCCACATTGCGTAATTGTTG       | 136              |
| <i>Aacb</i>    | CGCTCACCAACAGTAAGGTGG        | GCTTGGCAGGGAGTTCCTC          | 161              |
| <i>Acot1</i>   | GATGGTTTGGAGGTTGGGGAA        | ATCCTGCATGCGCCAGTCAA         | 185              |
| <i>Acox1</i>   | CCGCCACCTTCAATCCAGAG         | CAAGTTCTCGATTTCTCGACGG       | 86               |
| <i>Adam10</i>  | GGGCTGGGAGGTCAGTATGG         | GTGAGACTGCTCGTTTGGCA         | 118              |
| <i>Adipor2</i> | GGCCCATCATGCTATGGAAC         | GTGAGGGATCACTCGCCATC         | 76               |
| <i>Ahsg</i>    | CCACATCCTGAAACAAGACGG        | GCACAACCTACGAACGTCCTCT       | 91               |
| <i>Apoa1</i>   | TTGGCACGTATGGCAGCAAG         | GGAGATTCAGGTTTCACTGTTGG      | 155              |
| <i>Apoa4</i>   | AGCAGCTCAGTACCCTCTTCCA       | GTACGACAAAGGGCACCAGC         | 90               |
| <i>Atg14</i>   | AGCGGTGATTTTCGTCTATTTTCG     | GCTGTTCAATCCTCATCTTGCAT      | 187              |
| <i>Atg3</i>    | ACACGGTGAAGGGAAAGGC          | TGGTGGACTAAGTGATCTCCAG       | 130              |
| <i>Atgl</i>    | CAACGCCACTCACATCTACGG        | GGACACCTCAATAATGTTGGCAC      | 106              |
| <i>Cbr1</i>    | GCTGCTCCCTCTAATAAAACCC       | CCTCTGTGATGGTCTCGCTTC        | 125              |
| <i>Cd36</i>    | AGATGACGTGGCAAAGAACAG        | CCTTGGCTAGATAACGAACCTCTG     | 83               |
| <i>Chrebp</i>  | GATCCGACACTCACCCACC          | CCCGGCATAGCAACTTGAGG         | 106              |
| <i>Cox7a1</i>  | GCTCTGGTCCGGTCTTTTAGC        | GTAAGGGAGGTCATTGTCCGG        | 100              |
| <i>Cpt1a</i>   | CTCCGCTGAGCCATGAAG           | CACCAGTGATGATGCCATTCT        | 100              |
| <i>Crebh</i>   | CCTGTTTGATCGGCAGGAC          | CGGGGGACCATAATGGAGA          | 167              |
| <i>Csad</i>    | GGAGAGGCAGATCATTCTGGC        | GCTGGCAAACATCGGCAAT          | 122              |
| <i>Cyp7a1</i>  | GGGATTGCTGTGGTAGTGAGC        | GGTATGGAATCAACCCGTTGTC       | 100              |
| <i>Cyp8b1</i>  | CCTCTGGACAAGGGTTTTGTG        | GCACCGTGAAGACATCCCC          | 112              |
| <i>Dgat1</i>   | GCCTTACTGGTTGAGTCTATCAC      | GCACCACAGGTTGACATCC          | 108              |
| <i>Dgat2</i>   | GCGCTACTTCCGAGACTACTT        | GGGCCTTATGCCAGGAAACT         | 172              |
| <i>Dio1</i>    | AGAGACTCGTAGATGACTTTGCC      | GCCGGATGTCCACGTTGTT          | 108              |
| <i>Egfr</i>    | CAATGTTCCCATCGCTGTCGT        | TGTCTTTGCATGTGGCCTCAT        | 136              |
| <i>Elovl3</i>  | TTCTCACGCGGGTTAAAATGG        | GAGCAACAGATAGACGACCAC        | 126              |
| <i>Fasn</i>    | AGGTGGTGATAGCCGGTATGT        | TGGGTAATCCATAGAGCCAG         | 138              |

|               |                          |                         |     |
|---------------|--------------------------|-------------------------|-----|
| <i>Fatp2</i>  | TCGTGGAGGTCTGAAGTCACT    | GATGGTTGCCGCTTTTGAA     | 87  |
| <i>Fgf21</i>  | GTGTCAAAGCCTCTAGGTTTCTT  | GGTACACATTGTAACCGTCCTC  | 123 |
| <i>Fgfr2</i>  | GCTATAAGGTACGAAACCAGCAC  | GGTTGATGGACCCGTATTCATTC | 108 |
| <i>Fgfr4</i>  | CCTTCCACGGGGAGAATCG      | CTCCACAAGGCATGTGTATGT   | 113 |
| <i>Foxa2</i>  | TCCGACTGGAGCAGCTACTAC    | GCGCCACATAGGATGACA      | 176 |
| <i>Fxr</i>    | GCTGAGACTGGGTACCAGGG     | TCGGAAGAAACCTTTGCAGCC   | 183 |
| <i>G6pc3</i>  | TGCATGAATCCGGGTACTCCA    | GGCCGTCATTACAGGCCAAA    | 134 |
| <i>Gapdh</i>  | AGGTCGGTGTGAACGGATTTG    | TGTAGACCATGTAGTTGAGGTCA | 123 |
| <i>Gcgr</i>   | ATGCCACCACAACCTAAGCC     | GCCCACACCTCTTGAACACT    | 179 |
| <i>Gck</i>    | AGGAGGCCAGTGTAAAGATGT    | CTCCAGGTCTAAGGAGAGAAA   | 90  |
| <i>Ghr</i>    | CTGCAAAGAATCAATCCAAGCC   | CAGTTCAGGGGAACGACACTT   | 78  |
| <i>Glut2</i>  | ACTTGGAAAGGATCAAAGCAATGT | CAGTCTGAAATTAGCCCACAA   | 151 |
| <i>Gpam</i>   | CTTGGCCGATGTAAACACACC    | CTCCGGCTCATAAGGCTCTC    | 108 |
| <i>Gys2</i>   | CGCTCCTTGTGCGGTGACATC    | CATCGGCTGTGCTTTTGGC     | 160 |
| <i>Hmgcl</i>  | CCGGCATCAACTACCCAGTC     | GCGCTGGAAACTCTCCTCTAT   | 152 |
| <i>Hmgcr</i>  | AGAGCGAGTGCATTAGCAAAG    | GATTGCCATTCCACGAGCTAT   | 84  |
| <i>Hnf4a</i>  | CACGCGGAGGTCAAGCTAC      | CCCAGAGATGGGAGAGGTGAT   | 100 |
| <i>Hprt</i>   | TCAGTCAACGGGGACATAAA     | GGGGCTGTACTGCTTAACCAG   | 122 |
| <i>Hspa5</i>  | ACTTGGGGACCACCTATTCT     | ATCGCCAATCAGACGCTCC     | 134 |
| <i>Igf1</i>   | CACATCATGTGCTTTCACACC    | GGAAGCAACACTCATCCACAATG | 220 |
| <i>Igfbp1</i> | ATCAGCCCATCCTGTGGAAC     | TGCAGCTAATCTCTAGCACTT   | 128 |
| <i>Igfbp2</i> | CAGACGCTACGCTGCTATCC     | CCCTCAGAGTGGTCGTCATCA   | 140 |
| <i>Igfbp3</i> | TCTAAGCGGGAGACAGAATACG   | CTCTGGGACTCAGCACATTGA   | 91  |
| <i>Ikbke</i>  | GCGGAGGCTGAATCACCAG      | GAAAGCCCGAACGTGTTCTCA   | 147 |
| <i>Il18</i>   | GACTCTTGCCTCAACTTCAAGG   | CAGGCTGTCTTTTGTCAACGA   | 169 |
| <i>Il1b</i>   | GCAACTGTTTCTGAACTCAACT   | ATCTTTTGGGGTCCGTCAACT   | 89  |
| <i>Il6</i>    | CTGCAAGAGACTTCCATCCAG    | AGTGGTATAGACAGGTCTGTTGG | 131 |
| <i>Insig2</i> | TAAATCACGCCAGTGCTAAAGT   | GGTGACAACGGTTGCTAAGAAAG | 155 |
| <i>Insr</i>   | ATGGGCTTCGGGAGAGGAT      | GGATGTCCATAACCAGGGCAC   | 121 |
| <i>Kiss1</i>  | CTCTGTGTCGCCACCTATGG     | TCCCAGGCATTAACGAGTTC    | 96  |
| <i>Klb</i>    | GACACAACCTGATCAAGGCACA   | CCCAAGGTGATGGAGAGCCA    | 94  |
| <i>Lcn2</i>   | TCTGTCCCCACCGACCAATG     | TGGCTCTCTGGCAACAGGAA    | 132 |

|                   |                         |                             |     |
|-------------------|-------------------------|-----------------------------|-----|
| <i>Ldlr</i>       | TGACTCAGACGAACAAGGCTG   | ATCTAGGCAATCTCGGTCTCC       | 118 |
| <i>Lepr (all)</i> | GTCTTCGGGGATGTGAATGTC   | ACCTAAGGGTGGATCGGGTTT       | 158 |
| <i>Lepra</i>      | TCTTGTGTCCTACTGCTCGGA   | AAGAGTGTCCGTTCTCTTTTGGAA    | 135 |
| <i>Leprb</i>      | GACAAGCAGCAGAATGACGCA   | TGCTCAAATGTTTTCAGGCTTTTGGAA | 191 |
| <i>Lipc</i>       | CTCAGCACCCGGAAACACT     | CGCACTCACTATCTTCCAGATCC     | 122 |
| <i>Lpl</i>        | GGGAGTTTGGCTCCAGAGTTT   | TGTGTCTTCAGGGGTCCTTAG       | 115 |
| <i>Map1lc3b</i>   | TAATCAGACGGCGCTTGCA     | GCCATTGCTGTCCCGAATGT        | 175 |
| <i>Mif</i>        | CAAGCCCGCACAGTACATCG    | GTAGTTGCGGTTCTGGGCAC        | 133 |
| <i>Mpc2</i>       | GCCACCTACCACCGACTCA     | AGCACACACCAATCCCCATTT       | 135 |
| <i>Mtp</i>        | AGCCAGTGGGCATAGAAAATC   | GGTCACTTTACAATCCCCAGAG      | 110 |
| <i>Myca</i>       | GTGGTCTTTCCCTACCCGCT    | GCTCTTCTTCAGAGTCGCTGC       | 187 |
| <i>Nucb2</i>      | TGGCATGAATCACCACCTTCT   | CCGAGTCCGGTCATATTGCT        | 136 |
| <i>Pcp4l1</i>     | GAAAAAGGGAAGCCTGGCAGC   | CCGGAACTTGCCCTGGATTG        | 114 |
| <i>Pcsk9</i>      | GAGACCCAGAGGCTACAGATT   | AATGTACTCCACATGGGGCAA       | 177 |
| <i>Pdhh</i>       | GTGGAAGAAATACGGTGACAAGA | ACCTGGTCAATAGCTTGCATAGA     | 150 |
| <i>Pdk4</i>       | CCGCTTAGTGAACACTCCTTC   | TGACCAGCGTGTCTACAACT        | 134 |
| <i>Pepck</i>      | AGCATTCAACGCCAGGTTC     | CGAGTCTGTCAGTTCAATACCAA     | 118 |
| <i>Pklr</i>       | TCAAGGCAGGGATGAACATTG   | CACGGGTCTGTAGCTGAGTG        | 131 |
| <i>Ppara</i>      | AACATCGAGTGTCGAATATGTGG | CCGAATAGTTCGCCGAAAGAA       | 99  |
| <i>Pparg</i>      | GGAAGACCACTCGCATTCCCTT  | GTAATCAGCAACCATTGGGTCA      | 121 |
| <i>Ppargc1a</i>   | AAGTGGTGTAGCGACCAATCG   | AATGAGGGCAATCCGTCTTCA       | 161 |
| <i>Ppp1r3c</i>    | GAGCTGCACCAGAATGATCCA   | GGTGGTGAATGAGCCAAGCA        | 102 |
| <i>Ptpn1</i>      | GGAAGTGGGCGGCTATTTACC   | CAAAAGGGCTGACATCTCGGT       | 117 |
| <i>Pygl</i>       | CCGAGAGGGATGGCAGGTAG    | AAATGCACGGGCAGCATGAA        | 96  |
| <i>Scarb1</i>     | TGTACTGCCTAACATCTTGGTCC | ACTGTGCGGTTCATAAAAGCA       | 126 |
| <i>Scd1</i>       | TTCTTGCGATACTCTGGTGC    | CGGGATTGAATGTTCTTGTCTGT     | 98  |
| <i>Sdha</i>       | ATTGCTACTGGGGGCTACGG    | GTCCTGGCAAGGCAAACCAG        | 108 |
| <i>Sirt1</i>      | TGATTGGCACCGATCCTCG     | CCACAGCGTCATATCATCCAG       | 86  |
| <i>Socs3</i>      | ATGGTCACCCACAGCAAGTTT   | TCCAGTAGAATCCGCTCTCCT       | 145 |
| <i>Sqstm1</i>     | GAACTCGCTATAAGTGCAGTGT  | AGAGAAGCTATCAGAGAGGTGG      | 131 |
| <i>Srebfl</i>     | GATGTGCGAACTGGACACAG    | CATAGGGGGCGTCAAACAG         | 104 |
| <i>Stat3</i>      | CACCTTGGATTGAGAGTCAAGAC | AGGAATCGGCTATATTGCTGGT      | 112 |

|              |                         |                           |     |
|--------------|-------------------------|---------------------------|-----|
| <i>Thrb</i>  | ACACCAGCAATTACCAGAGTG   | GCAGCTCGAAGGGACATGA       | 125 |
| <i>Tlr4</i>  | CTCTCATGGCCTCCACTGGT    | TTAGGAACTACCTCTATGCAGGGAT | 137 |
| <i>Tnf</i>   | TCCGGGCAGGTCTACTTTGG    | CAGAGTTGGACCCTGAGCCA      | 177 |
| <i>Ucp2</i>  | GTGGTGGTCGGAGATAACCAGA  | GGGCAACATTGGGAGAAGTCC     | 102 |
| <i>Uqcrh</i> | GGACTAGAGGACGAACGAAAGA  | GGCCTTTACACACTTCTCCAG     | 129 |
| <i>Usmg5</i> | TGGGGTTCGGACGAAGATTG    | GCCTCCATATGTGGCCAGGA      | 136 |
| <i>Ywhaz</i> | GAAAAGTTCTTGATCCCCAATGC | TGTGACTGGTCCACAATTCCTT    | 134 |

3
