# Supplementary material for: FGF21 regulates hepatic metabolic pathways to improve steatosis and inflammation
Source: PubMed Central journal article supplement — Endocr Connect. 2020 Jul 19;9(8):755–68. doi: 10.1530/EC-20-0152 (PMC7424338; doi:10.1530/ec-20-0152), 2020-07-19
Supplement: supplementary_table_2.pdf [file supplementary_table_2.pdf]

## Supplementary Table 2

The table includes all hepatic genes measured in the study. Statistical analysis with one-way ANOVA with Tukey's post hoc test.<sup>M</sup> indicates that the experiment was conducted with conventional qPCR, normalized to *Gapdh*. The statistical analysis for these 5 genes was done separate. Green indicates a P-value <0.05.

| Protein name                                                                         | Transcript             | Chow vs control |         | FGF21 vs control |         | FGF21 vs chow |         |
|--------------------------------------------------------------------------------------|------------------------|-----------------|---------|------------------|---------|---------------|---------|
|                                                                                      |                        | FC              | P       | FC               | P       | FC            | P       |
| ATP-binding cassette sub-family G member 5 / Sterolin-1                              | <i>Abcg5</i>           | 1,1             | 5,8E-01 | <b>2,6</b>       | 3,0E-06 | <b>2,3</b>    | 3,8E-05 |
| ATP-binding cassette sub-family G member 8 / Sterolin-2                              | <i>Abcg8</i>           | 1,4             | 3,3E-01 | <b>2,5</b>       | 1,5E-03 | <b>1,9</b>    | 4,1E-02 |
| Acetyl CoA carboxylase 1                                                             | <i>Acaca</i>           | 1,3             | 9,1E-02 | <b>1,6</b>       | 4,5E-03 | 1,2           | 3,2E-01 |
| Acetyl CoA carboxylase 2                                                             | <i>Acacb</i>           | 1,5             | 2,9E-01 | 1,1              | 8,5E-01 | -1,3          | 6,5E-01 |
| Acyl-CoA thioesterase 1                                                              | <i>Acot1</i>           | -1,2            | 7,0E-01 | -1,4             | 3,5E-01 | -1,2          | 8,0E-01 |
| Acetyl-CoA oxidase 1                                                                 | <i>Acox1</i>           | -1,1            | 8,3E-01 | 1,1              | 8,0E-01 | 1,1           | 4,9E-01 |
| Disintegrin and metalloproteinase domain-containing protein 10                       | <i>Adam10</i>          | -1,0            | 9,9E-01 | 1,0              | 9,9E-01 | 1,0           | 9,6E-01 |
| Adiponectin receptor protein 2                                                       | <i>Adipor2</i>         | 1,2             | 2,4E-01 | <b>1,7</b>       | 5,4E-05 | <b>1,5</b>    | 3,0E-03 |
| Alpha-2-HS-glycoprotein / Fetuin-A                                                   | <i>Ahsg</i>            | 1,1             | 7,8E-01 | <b>2,3</b>       | 2,5E-05 | <b>2,1</b>    | 1,5E-04 |
| Apolipoprotein A1                                                                    | <i>Apoa1</i>           | 1,0             | 1,0E+00 | -1,2             | 4,2E-01 | -1,2          | 4,2E-01 |
| Apolipoprotein A4                                                                    | <i>Apoa4</i>           | <b>-4,5</b>     | 1,3E-05 | <b>-2,9</b>      | 1,7E-03 | 1,5           | 2,9E-01 |
| Beclin 1-associated autophagy-related key regulator / Autophagy-related protein 14   | <i>Atg14</i>           | 1,2             | 4,0E-01 | 1,3              | 1,3E-01 | 1,1           | 7,2E-01 |
| Ubiquitin-like-conjugating enzyme ATG3 / Autophagy-related protein 3                 | <i>Atg3</i>            | 1,1             | 4,2E-01 | -1,3             | 7,3E-02 | <b>-1,4</b>   | 6,2E-03 |
| Adipose triglyceride lipase / Patanin-like phospholipase domain-containing protein 2 | <i>Atgl (Pnlpa2)</i>   | 1,3             | 1,3E-01 | <b>2,0</b>       | 6,4E-05 | <b>1,6</b>    | 7,7E-03 |
| Carbonyl reductase 1                                                                 | <i>Cbr1</i>            | 1,1             | 7,9E-01 | 1,2              | 3,8E-01 | 1,1           | 7,6E-01 |
| Fatty acid translocase                                                               | <i>Cd36</i>            | <b>-1,9</b>     | 1,2E-02 | <b>-2,1</b>      | 8,6E-03 | -1,1          | 9,3E-01 |
| Carbohydrate-responsive element-binding protein (CREBP)                              | <i>Chrebp (Mlxipl)</i> | 1,5             | 3,1E-01 | <b>5,3</b>       | 2,5E-05 | <b>3,5</b>    | 9,9E-04 |
| Cytochrome c oxidase subunit 7a1                                                     | <i>Cox7a1</i>          | -1,1            | 5,8E-01 | <b>-1,5</b>      | 1,7E-02 | -1,3          | 1,3E-01 |
| Carnitine palmitoyltransferase 1a, liver                                             | <i>Cpt1a</i>           | -1,1            | 6,7E-01 | <b>2,2</b>       | 1,9E-04 | <b>2,5</b>    | 3,6E-05 |
| cAMP-responsive element-binding protein 3-like 3 (CREBH)                             | <i>Creb3l3 (Crebh)</i> | -1,1            | 7,4E-01 | <b>1,9</b>       | 4,9E-03 | <b>2,1</b>    | 1,1E-03 |
| Cystein sulfinic acid decarboxylase                                                  | <i>Csad</i>            | <b>2,9</b>      | 2,7E-03 | 1,6              | 3,1E-01 | -1,8          | 1,4E-01 |
| Cholesterol 7-alpha-monooxygenase                                                    | <i>Cyp7a1</i>          | 1,6             | 1,0E-01 | <b>3,9</b>       | 2,3E-05 | <b>2,4</b>    | 3,8E-03 |

|                                                                                                |                                             |             |         |             |         |             |         |
|------------------------------------------------------------------------------------------------|---------------------------------------------|-------------|---------|-------------|---------|-------------|---------|
| Sterol 12-alpha-hydroxylase                                                                    | <i>Cyp8b1</i>                               | 1,4         | 6,8E-02 | <b>2,5</b>  | 3,3E-05 | <b>1,7</b>  | 8,5E-03 |
| Diacylglycerol O-acyltransferase 2                                                             | <i>Dgat2</i>                                | -1,1        | 5,2E-01 | 1,3         | 6,4E-02 | <b>1,4</b>  | 7,7E-03 |
| Type I iodothyronine deiodinase                                                                | <i>Dio1</i>                                 | <b>-1,7</b> | 2,0E-02 | -1,0        | 1,0E+00 | <b>1,7</b>  | 4,1E-02 |
| Epidermal growth factor receptor                                                               | <i>Egfr</i>                                 | <b>2,6</b>  | 4,1E-02 | <b>4,3</b>  | 3,0E-03 | 1,7         | 4,2E-01 |
| Elongation of very long chain fatty acids protein 3                                            | <i>Elovl3</i>                               | <b>1,8</b>  | 4,4E-02 | <b>-3,6</b> | 1,1E-04 | <b>-6,5</b> | 6,0E-07 |
| Fatty acid synthase                                                                            | <i>Fasn</i>                                 | <b>1,9</b>  | 4,7E-02 | 1,6         | 1,8E-01 | -1,1        | 8,6E-01 |
| Fatty acid transport protein 2 /<br>Very long-chain acyl-CoA synthetase                        | <i>Fatp2</i><br>( <i>Slc27a2</i> )          | 1,1         | 7,6E-01 | <b>2,2</b>  | 4,5E-06 | <b>2,0</b>  | 3,0E-05 |
| Fibroblast growth factor 21                                                                    | <i>Fgf21</i>                                | <b>-2,3</b> | 7,2E-03 | <b>-2,2</b> | 1,5E-02 | 1,0         | 9,9E-01 |
| Fibroblast growth factor receptor 2                                                            | <i>Fgfr2</i>                                | 1,2         | 6,1E-01 | <b>2,3</b>  | 1,0E-04 | <b>2,0</b>  | 1,1E-03 |
| Fibroblast growth factor receptor 4                                                            | <i>Fgfr4</i>                                | 1,0         | 9,8E-01 | <b>2,6</b>  | 7,6E-05 | <b>2,5</b>  | 1,5E-04 |
| Forkhead box protein A2 /<br>Hepatocyte nuclear factor 3-beta                                  | <i>Foxa2</i><br>( <i>Hnf3b</i> )            | 1,4         | 2,7E-01 | <b>3,0</b>  | 2,9E-04 | <b>2,1</b>  | 1,3E-02 |
| Farnesoid X receptor / Bile acid receptor /<br>Nuclear receptor subfamily 1, group H, member 4 | <i>Fxr</i> ( <i>Bar</i> ,<br><i>Nr1h4</i> ) | 1,1         | 4,5E-01 | <b>1,9</b>  | 1,7E-06 | <b>1,7</b>  | 3,4E-05 |
| Glucose 6-phosphatase 3                                                                        | <i>G6pc3</i>                                | -1,0        | 9,8E-01 | <b>2,7</b>  | 3,1E-04 | <b>2,8</b>  | 2,7E-04 |
| Glucagon receptor                                                                              | <i>Gcgr</i>                                 | -1,1        | 9,1E-01 | <b>2,1</b>  | 2,3E-04 | <b>2,3</b>  | 1,2E-04 |
| Glucokinase                                                                                    | <i>Gck</i>                                  | -1,1        | 6,6E-01 | <b>1,4</b>  | 2,9E-02 | <b>1,6</b>  | 5,3E-03 |
| Growth hormone receptor                                                                        | <i>Ghr</i>                                  | -1,1        | 7,4E-01 | -1,3        | 1,0E-01 | -1,2        | 3,4E-01 |
| Glucose transporter type 2                                                                     | <i>Glut2</i><br>( <i>Slc2a2</i> )           | 1,1         | 4,8E-01 | <b>1,5</b>  | 1,0E-02 | 1,3         | 1,2E-01 |
| Glycerol-3-phosphate acyltransferase                                                           | <i>Gpam</i><br>( <i>Gpat1</i> )             | 1,0         | 9,6E-01 | 1,3         | 3,2E-01 | 1,2         | 4,8E-01 |
| Glycogen synthase                                                                              | <i>Gys2</i>                                 | -1,2        | 1,5E-01 | 1,1         | 6,9E-01 | <b>1,3</b>  | 4,2E-02 |
| HMG-CoA lyase                                                                                  | <i>Hmgcl<sup>M</sup></i>                    | -1,4        | 1,1E-01 | <b>-2,0</b> | 3,8E-04 | <b>-1,5</b> | 4,6E-02 |
| HMG-CoA reductase                                                                              | <i>Hmgcr</i>                                | <b>1,7</b>  | 3,1E-02 | <b>3,8</b>  | 4,6E-06 | <b>2,2</b>  | 2,7E-03 |
| Hepatocyte nuclear factor 4-alpha                                                              | <i>Hnf4a</i>                                | 1,1         | 8,4E-01 | <b>2,4</b>  | 1,6E-05 | <b>2,2</b>  | 7,3E-05 |
| 78 kDa glucose-regulated protein (GRP78)                                                       | <i>Hspa5</i>                                | 1,1         | 7,4E-01 | <b>1,7</b>  | 2,5E-03 | <b>1,5</b>  | 1,6E-02 |
| Insulin-like growth factor 1                                                                   | <i>Igf1</i>                                 | 1,1         | 8,2E-01 | -1,4        | 1,1E-01 | <b>-1,5</b> | 4,1E-02 |
| Insulin-like growth factor-binding protein 1                                                   | <i>Igfbp1</i>                               | -1,3        | 6,2E-01 | -1,8        | 1,8E-01 | -1,4        | 6,1E-01 |
| Insulin-like growth factor-binding protein 2                                                   | <i>Igfbp2</i>                               | <b>2,3</b>  | 1,2E-02 | <b>9,5</b>  | 1,6E-07 | <b>4,1</b>  | 2,0E-04 |
| Insulin-like growth factor-binding protein 3                                                   | <i>Igfbp3</i>                               | -1,3        | 4,0E-01 | -1,5        | 8,5E-02 | -1,2        | 5,9E-01 |
| Inhibitor of nuclear kappa-B kinase subunit epsilon                                            | <i>Ikbke</i>                                | 1,2         | 6,2E-01 | <b>3,8</b>  | 1,0E-05 | <b>3,1</b>  | 1,1E-04 |
| Interleukin 18                                                                                 | <i>Il18</i>                                 | -1,1        | 9,3E-01 | <b>-3,5</b> | 1,1E-03 | <b>-3,2</b> | 3,0E-03 |

|                                                                  |                          |             |         |             |         |             |         |
|------------------------------------------------------------------|--------------------------|-------------|---------|-------------|---------|-------------|---------|
| Interleukin 1 beta                                               | <i>Il1b</i>              | -1,3        | 5,9E-01 | 1,2         | 7,3E-01 | 1,6         | 2,4E-01 |
| Insulin-induced gene 2                                           | <i>Insig2</i>            | -1,2        | 8,1E-01 | <b>-5,8</b> | 1,8E-06 | <b>-5,0</b> | 9,4E-06 |
| Insulin receptor                                                 | <i>Insr</i>              | <b>1,7</b>  | 3,4E-02 | <b>3,6</b>  | 6,6E-06 | <b>2,2</b>  | 3,6E-03 |
| Beta-klotho                                                      | <i>Klb</i>               | 1,2         | 1,0E-01 | <b>1,4</b>  | 8,1E-03 | 1,1         | 4,1E-01 |
| Neutrophil gelatinase-associated lipocalin / Lipocalin 2         | <i>Lcn2 (Ngal)</i>       | <b>-5,6</b> | 1,1E-04 | <b>-4,9</b> | 6,3E-04 | 1,1         | 9,4E-01 |
| Low-density lipoprotein receptor                                 | <i>Ldlr</i>              | 1,1         | 8,1E-01 | <b>3,1</b>  | 2,0E-05 | <b>2,8</b>  | 1,1E-04 |
| Leptin receptor isoform a                                        | <i>Lepra<sup>M</sup></i> | 1,2         | 4,8E-01 | <b>2,9</b>  | 1,3E-05 | <b>2,4</b>  | 2,4E-04 |
| Leptin receptor, all transcript variants                         | <i>Lepr<sup>M</sup></i>  | 1,0         | 9,9E-01 | <b>2,9</b>  | 1,3E-04 | <b>2,9</b>  | 2,1E-04 |
| Hepatic triacylglycerol lipase                                   | <i>Lipc (Hpl)</i>        | 1,3         | 5,3E-02 | <b>2,4</b>  | 2,9E-06 | <b>1,7</b>  | 1,0E-03 |
| Lipoprotein lipase                                               | <i>Lpl</i>               | <b>-1,5</b> | 1,6E-02 | 1,3         | 1,4E-01 | <b>1,9</b>  | 2,8E-04 |
| Microtubule-associated proteins 1A-1B light chain 3B             | <i>Map1lc3b (Lc3b)</i>   | 1,0         | 1,0E+00 | <b>-1,7</b> | 4,8E-03 | <b>-1,7</b> | 5,4E-03 |
| Macrophage migration inhibitory factor                           | <i>Mif</i>               | 1,2         | 4,9E-01 | 1,1         | 9,4E-01 | -1,1        | 7,5E-01 |
| Mitochondrial pyruvate carrier 2                                 | <i>Mpc2</i>              | -1,1        | 9,3E-01 | <b>-2,4</b> | 5,0E-03 | <b>-2,2</b> | 1,3E-02 |
| Microsomal triglyceride transfer protein                         | <i>Mttp</i>              | <b>1,3</b>  | 4,8E-02 | <b>2,2</b>  | 1,9E-06 | <b>1,7</b>  | 6,9E-04 |
| Nucleobindin-2 (cleaved to Nesfatin-1)                           | <i>Nucb2</i>             | -1,1        | 8,3E-01 | -1,1        | 6,4E-01 | -1,0        | 9,3E-01 |
| Purkinje cell protein 4-like protein 1                           | <i>Pcp4ll</i>            | -1,6        | 7,0E-02 | <b>2,2</b>  | 4,4E-03 | <b>3,6</b>  | 2,9E-05 |
| Proprotein convertase subtilisin/kexin type 9                    | <i>Pcsk9</i>             | 1,2         | 6,4E-01 | <b>3,3</b>  | 6,7E-05 | <b>2,7</b>  | 6,9E-04 |
| Pyruvate dehydrogenase E1 component subunit b                    | <i>Pdhb</i>              | -1,1        | 5,8E-01 | <b>-1,6</b> | 2,2E-03 | <b>-1,4</b> | 2,3E-02 |
| Pyruvate dehydrogenase kinase isozyme 4                          | <i>Pdk4</i>              | 1,0         | 9,8E-01 | -1,6        | 7,4E-02 | -1,7        | 5,9E-02 |
| Phosphoenolpyruvate carboxykinase                                | <i>Pepck (Pck1)</i>      | 1,2         | 5,8E-01 | <b>1,9</b>  | 3,8E-03 | <b>1,6</b>  | 3,8E-02 |
| Pyruvate kinase                                                  | <i>Pklr</i>              | 1,1         | 7,2E-01 | 1,1         | 6,7E-01 | 1,0         | 9,9E-01 |
| Peroxisome proliferator-activated receptor alpha                 | <i>Ppara</i>             | <b>-1,2</b> | 4,8E-02 | <b>1,6</b>  | 1,7E-04 | <b>1,9</b>  | 9,1E-07 |
| Peroxisome proliferator-activated receptor gamma                 | <i>Pparg</i>             | -1,2        | 6,7E-01 | <b>-3,5</b> | 1,0E-06 | <b>-3,0</b> | 9,4E-06 |
| Peroxisome proliferator-activated receptor gamma co-activator 1a | <i>Ppargc1a</i>          | 1,1         | 8,4E-01 | <b>2,1</b>  | 7,7E-05 | <b>2,0</b>  | 3,6E-04 |
| Protein phosphatase 1 regulatory subunit 3c                      | <i>Ppp1r3c</i>           | 1,2         | 6,6E-01 | 1,5         | 1,1E-01 | 1,3         | 4,2E-01 |
| Tyrosine-protein phosphatase non-receptor type 1                 | <i>Ptp1b (Ptpn1)</i>     | 1,4         | 1,6E-01 | <b>1,9</b>  | 2,3E-03 | 1,4         | 1,3E-01 |
| Glycogen phosphorylase liver                                     | <i>Pygl</i>              | 1,4         | 1,2E-01 | <b>2,6</b>  | 1,1E-04 | <b>1,8</b>  | 1,4E-02 |
| Scavenger receptor class B member 1 (SR-B1)                      | <i>Scarb1</i>            | 1,1         | 9,1E-01 | <b>3,4</b>  | 5,1E-07 | <b>3,2</b>  | 1,7E-06 |
| Stearoyl-CoA desaturase 1                                        | <i>Scd1</i>              | 1,7         | 1,2E-01 | <b>-5,3</b> | 1,7E-05 | <b>-9,3</b> | 3,0E-07 |

|                                                    |                                                |            |         |             |         |             |         |
|----------------------------------------------------|------------------------------------------------|------------|---------|-------------|---------|-------------|---------|
| NAD-dependent protein deacetylase sirtuin-1        | <i>Sirt1</i>                                   | 1,2        | 4,1E-01 | <b>2,1</b>  | 8,7E-06 | <b>1,8</b>  | 2,1E-04 |
| Suppressor of cytokine signaling-3                 | <i>Socs3</i>                                   | <b>3,1</b> | 2,5E-03 | <b>5,2</b>  | 7,1E-05 | 1,7         | 2,4E-01 |
| Sequestosome-1                                     | <i>Sqstm1</i>                                  | 1,1        | 8,3E-01 | 1,5         | 6,6E-02 | 1,4         | 1,9E-01 |
| Sterol regulatory element-binding protein 1        | <i>Srebf1<sup>M</sup></i><br>( <i>Srebp1</i> ) | 1,3        | 3,4E-01 | <b>2,2</b>  | 4,5E-04 | <b>1,7</b>  | 1,4E-02 |
| Signal transducer and activator of transcription 3 | <i>Stat3</i>                                   | 1,3        | 1,3E-01 | 1,4         | 1,0E-01 | 1,0         | 9,6E-01 |
| Thyroid hormone receptor beta                      | <i>Thrb</i>                                    | 1,1        | 4,1E-01 | <b>1,6</b>  | 6,0E-04 | <b>1,4</b>  | 1,3E-02 |
| Mitochondrial uncoupling protein 2                 | <i>Ucp2</i>                                    | -1,3       | 6,3E-02 | 1,2         | 4,6E-01 | <b>1,5</b>  | 7,2E-03 |
| Cytochrome b-c1 complex subunit 6                  | <i>Uqcrc1</i>                                  | -1,0       | 9,7E-01 | <b>-1,6</b> | 4,6E-02 | -1,5        | 7,9E-02 |
| Up-regulated during skeletal muscle growth 5       | <i>Usmg5</i><br>( <i>Dapit</i> )               | -1,0       | 9,6E-01 | <b>-1,7</b> | 1,2E-02 | <b>-1,7</b> | 2,6E-02 |
